# Supplementary material for: Substrate Specificity and Structural Modeling of Human Carboxypeptidase Z: A Unique Protease with a Frizzled-Like Domain
Source: PubMed Central journal article supplement (PMC7698808; doi:10.3390/ijms21228687), 2020-11-18
Supplement: ijms-21-08687-s001.pdf [file ijms-21-08687-s001.pdf]

## SUPPLEMENTARY MATERIAL

# **Substrate specificity and structural modeling of human Carboxypeptidase Z: A unique protease with a Frizzled-like domain**

Javier Garcia-Pardo<sup>1</sup>, Sebastian Tanco<sup>1,2</sup>, Maria C. Garcia-Guerrero<sup>1</sup>, Sayani Dasgupta<sup>3</sup>, Francesc X.

Aviles<sup>1</sup>, Julia Lorenzo<sup>1\*</sup> and Lloyd D. Fricker<sup>3\*</sup>

<sup>1</sup>Institut de Biotecnologia i Biomedicina and Departament de Bioquímica i Biologia Molecular, Universitat Autònoma de Barcelona, 08193 Bellaterra, Barcelona, Spain.

<sup>2</sup>BiosenSource BV. B-1800 Vilvoorde,, Belgium

<sup>3</sup>Department of Molecular Pharmacology, Albert Einstein College of Medicine, Bronx, New York 10461, USA.

\*To whom correspondence should be addressed: Tel.: +34-935868936; Fax: +34-935812011; E-mail: [Julia.Lorenzo@uab.es](mailto:Julia.Lorenzo@uab.es)

\*To whom correspondence should be addressed: Tel.: +1-718-430-4225; Fax: +1-718-430-8922; E-mail: [Lloyd.Fricker@einstein.yu.edu](mailto:Lloyd.Fricker@einstein.yu.edu).

## Supplementary Tables

**Table S1. Non-substrates of CPZ identified using HEK293T peptides**

| Precursor                                                            | Sequence                           | Z | T | Obs M   | Theor M  | ppm | Ratio CPZ / No enzyme |       |      |        |
|----------------------------------------------------------------------|------------------------------------|---|---|---------|----------|-----|-----------------------|-------|------|--------|
|                                                                      |                                    |   |   |         |          |     | 100 nM                | 10 nM | 1 nM | 0.1 nM |
| Eukaryotic translation initiation factor 4H                          | ATPLNQVANPNSAIFGGARPRE<br>EVVQKEQE | 4 | 2 | 3248.69 | 3248.65  | 12  | 0.83                  | 1.07  | 1.07 | 1.07   |
| Acidic nuclear phosphoprotein pp32                                   | STIEPLKK                           | 3 | 3 | 914.53  | 914.54   | -20 | 0.85                  | 0.90  | 1.15 | 1.07   |
| Elongation factor 1 beta                                             | GFGDLKSPAGLQV                      | 2 | 2 | 1287.68 | 1287.68  | 0   | 0.87                  | 0.87  | 1.00 | 0.95   |
| Protein SET (Phosphatase 2A inhibitor I2PP2A) - isoform 2            | Ac-SAPAAKVSKKEL                    | 2 | 3 | 1269.72 | 1269.73  | -9  | 0.90                  | 0.93  | 0.95 | 0.96   |
| RNA binding motif protein 3                                          | Ac-SSEEGKLFVGG LNF                 | 2 | 1 | 1524.77 | 1524.75  | 15  | 0.90                  | 1.00  | 0.85 | 0.85   |
| Vimentin                                                             | LIKTVETRDGQVINETSQ                 | 3 | 2 | 2030.07 | 2030.04  | 2   | 0.90                  | 0.95  | 0.90 | 0.95   |
| FK506 Binding Protein                                                | GVQVETISPGDGRTFPKRGQ               | 4 | 2 | 2128.12 | 2128.12  | 9   | 0.94                  | 1.00  | 1.05 | 0.91   |
| Ubiquitin-60S ribosomal protein L40                                  | IIEPSLRQL                          | 2 | 1 | 1067.64 | 1067.64  | 9   | 0.94                  | 0.90  | 0.88 | 0.81   |
| 40S Ribosomal protein S28                                            | Ac-MoxDTSRVQPIKLA                  | 2 | 1 | 1415.76 | 1415.75  | 6   | 0.94                  | 1.04  | 1.04 | 1.19   |
| Complement component 1 Q subcomponent-binding protein, mitochondrial | ADRGVDNTFADELVEL                   | 2 | 1 | 1762.86 | 1762.84  | 14  | 0.94                  | 1.06  | 1.29 | 1.06   |
| Peptidylprolyl isomerase A                                           | ADKVPKTAENFRAL                     | 4 | 3 | 1558.84 | 1558.850 | -7  | 0.96                  | 0.99  | 1.02 | 1.11   |
| Heat shock 10kDa protein 1 (chaperonin 10)                           | GGIMLPEKSQGKVLQA                   | 3 | 3 | 1654.89 | 1654.90  | -9  | 0.97                  | 0.97  | 1.07 | 0.50   |
| Nucleophosmin                                                        | ASIEKGGSLPKVEA                     | 3 | 3 | 1384.75 | 1384.76  | -5  | 0.99                  | 0.99  | 0.95 | 0.97   |
| 40S Ribosomal protein S21                                            | KADGIVSK                           | 3 | 3 | 816.44  | 816.47   | -33 | 1.00                  | 0.94  | 1.09 | 1.12   |
| 40S Ribosomal protein S28                                            | Ac-MoxDTSRVQPIKL                   | 2 | 1 | 1344.72 | 1344.71  | 5   | 1.00                  | 1.07  | 1.07 | 1.19   |
| Heat shock 10kDa protein 1 (chaperonin 10)                           | GGIMLPEKSQGKVL                     | 3 | 3 | 1455.79 | 1455.81  | -14 | 1.00                  | 0.98  | 1.05 | 1.00   |
| Heterogeneous nuclear ribonucleoprotein D0                           | FGGFGEVESIEL                       | 2 | 1 | 1282.61 | 1282.61  | 2   | 1.00                  | 1.00  | 1.13 | 0.94   |

|                                                                   |                      |   |   |         |         |     |      |      |      |      |
|-------------------------------------------------------------------|----------------------|---|---|---------|---------|-----|------|------|------|------|
| Heat shock 10kDa protein 1 (chaperonin 10)                        | GSGSKGKGGEIQVSV      | 3 | 3 | 1485.78 | 1485.78 | -2  | 1.03 | 0.93 | 1.13 | 0.95 |
| Peptidylprolyl isomerase A                                        | ELFADKVPKTA          | 3 | 3 | 1217.65 | 1217.67 | -16 | 1.05 | 1.00 | 1.16 | 1.05 |
| Cytochrome c oxidase subunit 5a                                   | GISTPEELGLDKV        | 2 | 2 | 1356.72 | 1356.71 | 3   | 1.06 | 1.00 | 1.09 | 1.09 |
| Nucleophosmin                                                     | GGFEITPPVVL          | 2 | 1 | 1127.63 | 1127.62 | 4   | 1.06 | 1.06 | 1.13 | 1.06 |
| Peptidylprolyl isomerase A                                        | VNPTVFFDI            | 2 | 1 | 1050.54 | 1050.54 | 5   | 1.07 | 1.07 | 0.93 | 1.07 |
| FK506 Binding Protein                                             | VFDVELL              | 2 | 1 | 833.46  | 833.45  | 3   | 1.07 | 1.00 | 1.07 | 1.14 |
| Heat shock 10kDa protein 1 (chaperonin 10)                        | TVVAVGSGSKGKGGEIQVSV | 4 | 3 | 1955.07 | 1955.07 | 1   | 1.08 | 1.10 | 1.14 | 1.17 |
| FK506 Binding Protein                                             | VFDVELLKLE           | 2 | 2 | 1203.68 | 1203.68 | 2   | 1.08 | 1.07 | 1.11 | 1.08 |
| 40S Ribosomal protein S29                                         | AKDIGFIKLD           | 3 | 3 | 1118.61 | 1118.63 | -18 | 1.08 | 0.93 | 1.03 | 0.98 |
| Cathepsin D                                                       | GPIPEVLK             | 2 | 2 | 851.51  | 851.51  | -4  | 1.08 | 1.00 | 1.00 | 0.83 |
| Protein SET (Phosphatase 2A inhibitor I2PP2A) - isoform 1,2, or 3 | SELIAKI              | 2 | 2 | 772.46  | 772.47  | -17 | 1.11 | 1.07 | 1.15 | 1.11 |
| Heterogeneous nuclear ribonucleoprotein A/B isoform 1, 2 or 3     | FGFEIGEIAIEL         | 2 | 1 | 1352.67 | 1352.65 | 15  | 1.11 | 1.00 | 1.11 | 1.06 |
| Heat shock 10kDa protein 1 (chaperonin 10)                        | VGSGSKGKGGEIQVSV     | 3 | 3 | 1584.84 | 1584.85 | -3  | 1.12 | 1.10 | 1.13 | 1.18 |
| Elongation factor 1 beta                                          | GFGDLKSPAGL          | 2 | 2 | 1060.54 | 1060.56 | -10 | 1.13 | 1.06 | 1.06 | 1.03 |
| CD99 antigen                                                      | AEPAVQRTLLEK         | 3 | 2 | 1353.76 | 1353.76 | 1   | 1.13 | 1.08 | 1.11 | 0.91 |
| Nucleophosmin                                                     | EKGGS LPKVEA         | 3 | 3 | 1113.57 | 1113.60 | -26 | 1.13 | 1.07 | 1.24 | 1.00 |
| Peptidylprolyl isomerase A                                        | ELFADKVPKTAENFRAL    | 4 | 3 | 1948.03 | 1948.04 | -4  | 1.13 | 0.93 | 1.03 | 1.20 |
| 60S acidic ribosomal protein P2 polymorphism                      | DGKNIEDVIAQGIGKL     | 3 | 3 | 1668.88 | 1668.91 | -15 | 1.14 | 1.05 | 1.19 | 1.09 |
| Superoxide dismutase 1                                            | KGDGPVQGIINF         | 2 | 2 | 1243.65 | 1243.66 | -6  | 1.14 | 1.06 | 1.14 | 0.94 |

|                                                                      |                    |   |   |         |         |     |      |      |      |      |
|----------------------------------------------------------------------|--------------------|---|---|---------|---------|-----|------|------|------|------|
| 40S Ribosomal protein S21                                            | KADGIVSKNF         | 3 | 3 | 1077.57 | 1077.58 | -13 | 1.14 | 1.03 | 1.08 | 1.08 |
| 40S Ribosomal protein S21                                            | AKADGIVSKNF        | 2 | 3 | 1148.61 | 1148.62 | -9  | 1.15 | 0.86 | 1.15 | 0.98 |
| Heterogeneous nuclear ribonucleoprotein D-like                       | KDAASVDKVLEL       | 3 | 3 | 1286.69 | 1286.71 | -12 | 1.15 | 1.09 | 1.15 | 1.09 |
| Triosephosphate isomerase 1                                          | LDPKIAVA           | 2 | 2 | 825.48  | 825.50  | -21 | 1.15 | 1.06 | 1.06 | 1.00 |
| Heat shock 10kDa protein 1 (chaperonin 10)                           | LPLFDRVLVE         | 2 | 1 | 1199.70 | 1199.69 | 9   | 1.15 | 1.19 | 1.19 | 1.03 |
| 60S acidic ribosomal protein P2                                      | VGIEADDDRLNKV      | 3 | 2 | 1442.74 | 1442.74 | 0   | 1.16 | 1.02 | 1.05 | 1.05 |
| Triosephosphate isomerase 1                                          | SLGELIGTLNA        | 2 | 1 | 1086.60 | 1086.59 | 3   | 1.16 | 1.16 | 1.19 | 1.09 |
| 40S Ribosomal protein S21                                            | ADGIVSKNF          | 2 | 2 | 949.48  | 949.48  | -6  | 1.17 | 1.10 | 1.10 | 1.04 |
| 60S Ribosomal protein L31                                            | KNLQTVNVDEN        | 2 | 2 | 1272.64 | 1272.63 | 4   | 1.17 | 0.97 | 1.10 | 0.91 |
| Nucleophosmin                                                        | TPKTPKGPSSVEDIKA   | 4 | 4 | 1653.87 | 1653.89 | -12 | 1.17 | 1.08 | 1.17 | 1.04 |
| Heterogeneous nuclear ribonucleoprotein D-like                       | ASVDKVLEL          | 2 | 2 | 972.54  | 972.55  | -8  | 1.17 | 1.06 | 1.14 | 1.07 |
| 40S Ribosomal protein S21                                            | AKADGIVSKNF        | 3 | 3 | 1148.60 | 1148.62 | -17 | 1.18 | 1.06 | 1.06 | 0.94 |
| Elongation factor 1 beta                                             | GFGDLKSPAGLQVL     | 2 | 2 | 1400.76 | 1400.77 | -6  | 1.18 | 0.94 | 0.94 | 0.82 |
| Nucleophosmin                                                        | GGSLPKVEA          | 2 | 2 | 856.46  | 856.47  | -10 | 1.18 | 0.99 | 1.13 | 0.99 |
| FK506 Binding Protein                                                | VELLKLE            | 2 | 2 | 842.50  | 842.51  | -14 | 1.19 | 1.00 | 1.14 | 1.04 |
| Complement component 1 Q subcomponent-binding protein, mitochondrial | DRGVDNTFADELVELSTA | 2 | 1 | 1950.95 | 1950.92 | 17  | 1.19 | 1.13 | 0.88 | 1.13 |

Non-substrates; peptides not affected (with a decrease  $\leq 20\%$  or an increase  $\leq 120\%$  by the highest concentration of enzyme). See Table 2 for abbreviation definitions.

**Table S2. Non-substrates of CPZ identified using the tryptic peptide library**

| Protein precursor    | Sequence        | Z | T | Obs M   | Theor M | ppm | Ratio CPZ / No enzyme |       |      |
|----------------------|-----------------|---|---|---------|---------|-----|-----------------------|-------|------|
|                      |                 |   |   |         |         |     | 100 nM                | 10 nM | 1 nM |
| $\alpha$ -Hemoglobin | VDPVNFK         | 2 | 2 | 817.42  | 817.43  | -14 | 0.82                  | 0.76  | 0.91 |
| $\alpha$ -Hemoglobin | LRVDPVNFK       | 3 | 2 | 1086.62 | 1086.62 | -3  | 0.83                  | 0.80  | 0.75 |
| Thyroglobulin        | ILNDAQTK        | 2 | 2 | 901.48  | 901.49  | -11 | 0.85                  | 0.82  | 0.88 |
| Thyroglobulin        | VTLAADR         | 2 | 1 | 744.42  | 744.41  | 12  | 0.86                  | 0.86  | 0.97 |
| Thyroglobulin        | ETFLEK          | 2 | 2 | 765.38  | 765.39  | -8  | 0.87                  | 0.90  | 1.00 |
| Thyroglobulin        | SALGEPKK        | 2 | 1 | 828.48  | 828.47  | 7   | 0.89                  | 0.86  | 0.97 |
| Thyroglobulin        | KFEKLPESK       | 4 | 4 | 1104.59 | 1104.62 | -27 | 0.89                  | 0.90  | 0.97 |
| Bovine serum albumin | LVNELTEFAK      | 2 | 2 | 1162.62 | 1162.62 | -4  | 0.89                  | 0.89  | 0.92 |
| Thyroglobulin        | IDVALR          | 2 | 1 | 685.42  | 685.41  | 12  | 0.90                  | 0.90  | 0.93 |
| Thyroglobulin        | QAGVQAEPSPK     | 2 | 2 | 1110.57 | 1110.57 | 0   | 0.91                  | 0.83  | 1.00 |
| Thyroglobulin        | RSLLLAPEEGPVSQR | 3 | 1 | 1650.93 | 1650.91 | 13  | 0.93                  | 0.93  | 1.00 |
| Thyroglobulin        | ALADLAKP        | 2 | 2 | 797.45  | 797.46  | -17 | 0.93                  | 0.83  | 0.90 |
| Thyroglobulin        | AVKQFEESQGR     | 2 | 2 | 1277.64 | 1277.64 | 1   | 0.94                  | 0.91  | 0.97 |
| Thyroglobulin        | ELSVLLPNR       | 2 | 1 | 1039.61 | 1039.60 | 8   | 0.94                  | 1.00  | 1.00 |
| Thyroglobulin        | LTDEELAFPPLSPSR | 3 | 1 | 1670.86 | 1670.85 | 7   | 0.95                  | 1.08  | 1.14 |
| Bovine serum albumin | DDSPDLPK        | 2 | 2 | 885.39  | 885.41  | -19 | 0.95                  | 0.92  | 0.97 |
| $\alpha$ -Hemoglobin | VLSPADKTNVK     | 3 | 3 | 1170.65 | 1170.66 | -5  | 0.96                  | 0.91  | 0.88 |
| Bovine serum albumin | LVTDLTK         | 2 | 2 | 788.45  | 788.46  | -7  | 0.97                  | 0.92  | 0.90 |
| Thyroglobulin        | LGGQEIR         | 2 | 1 | 771.43  | 771.42  | 12  | 0.98                  | 0.95  | 0.96 |
| Thyroglobulin        | SLSLK           | 2 | 2 | 546.33  | 546.34  | -24 | 1.00                  | 0.83  | 0.83 |
| Thyroglobulin        | KVVLQDR         | 2 | 2 | 856.51  | 856.51  | 0   | 1.00                  | 0.97  | 0.97 |
| Thyroglobulin        | FVAPESLK        | 2 | 2 | 889.48  | 889.49  | -6  | 1.00                  | 0.93  | 0.93 |
| Thyroglobulin        | ALADLAKPL       | 2 | 2 | 910.55  | 910.55  | 1   | 1.00                  | 0.91  | 0.94 |
| Thyroglobulin        | ASGLGAAAGQR     | 2 | 1 | 957.50  | 957.50  | 2   | 1.00                  | 0.90  | 0.97 |
| Thyroglobulin        | LVTLAESPR       | 2 | 1 | 984.57  | 984.56  | 8   | 1.00                  | 0.93  | 0.86 |

|                      |                       |   |   |         |         |     |      |      |      |
|----------------------|-----------------------|---|---|---------|---------|-----|------|------|------|
| Thyroglobulin        | LNSNPASEAPK           | 2 | 2 | 1126.56 | 1126.56 | 1   | 1.00 | 0.83 | 0.86 |
| Thyroglobulin        | KGQEFTITGQK           | 2 | 3 | 1235.63 | 1235.65 | -13 | 1.00 | 0.87 | 0.89 |
| Thyroglobulin        | VVLQDR                | 2 | 1 | 728.42  | 728.42  | -1  | 1.01 | 0.94 | 1.05 |
| Thyroglobulin        | SLLLPEEGPVSR          | 3 | 1 | 1494.81 | 1494.80 | 7   | 1.02 | 0.86 | 1.09 |
| Bovine serum albumin | DAIPENLPPLTADFAEDK    | 3 | 2 | 1954.97 | 1954.95 | 8   | 1.03 | 0.90 | 1.05 |
| Bovine serum albumin | LVVSTQTALA            | 2 | 1 | 1001.58 | 1001.58 | 0   | 1.03 | 1.06 | 1.07 |
| $\alpha$ -Hemoglobin | Ac-VLSPADKTNVK        | 2 | 2 | 1212.67 | 1212.67 | 1   | 1.03 | 1.08 | 1.02 |
| Thyroglobulin        | QQAAALAK              | 2 | 2 | 799.44  | 799.46  | -20 | 1.03 | 0.87 | 0.93 |
| Bovine serum albumin | AEFVEVTK              | 2 | 2 | 921.47  | 921.48  | -7  | 1.05 | 0.97 | 1.01 |
| Trypsin              | VATVSLPR              | 2 | 1 | 841.51  | 841.50  | 12  | 1.06 | 0.91 | 1.03 |
| Thyroglobulin        | FAATSFR               | 2 | 1 | 798.41  | 798.40  | 8   | 1.07 | 1.00 | 1.03 |
| Thyroglobulin        | GQEIPGTR              | 2 | 1 | 856.45  | 856.44  | 11  | 1.07 | 1.00 | 1.07 |
| Thyroglobulin        | LQQNLFQGR             | 2 | 1 | 1031.54 | 1031.55 | -9  | 1.07 | 1.00 | 0.97 |
| Thyroglobulin        | FLQGDR                | 2 | 1 | 734.37  | 734.37  | 6   | 1.08 | 0.94 | 1.00 |
| Thyroglobulin        | RLVTLAESPR            | 3 | 1 | 1140.67 | 1140.66 | 11  | 1.09 | 0.97 | 0.98 |
| Thyroglobulin        | LTDEELAFPPLSPSRETFLEK | 3 | 2 | 2418.25 | 2418.23 | 9   | 1.09 | 0.97 | 1.00 |
| $\beta$ -Hemoglobin  | VNVDEVGGEALGR         | 2 | 1 | 1313.67 | 1313.66 | 10  | 1.17 | 1.00 | 1.17 |
| Thyroglobulin        | VDLLIGSSQDDGLINR      | 2 | 1 | 1713.91 | 1713.89 | 14  | 1.18 | 1.09 | 1.18 |

<sup>1</sup>Fragment originated from trypsin autolysis; Non-substrates; peptides not affected (with a decrease  $\leq 20\%$  or an increase  $\leq 120\%$  by the highest concentration of enzyme). See Table 2 for abbreviation definitions.

## Supplementary Figures

**Figure S1**

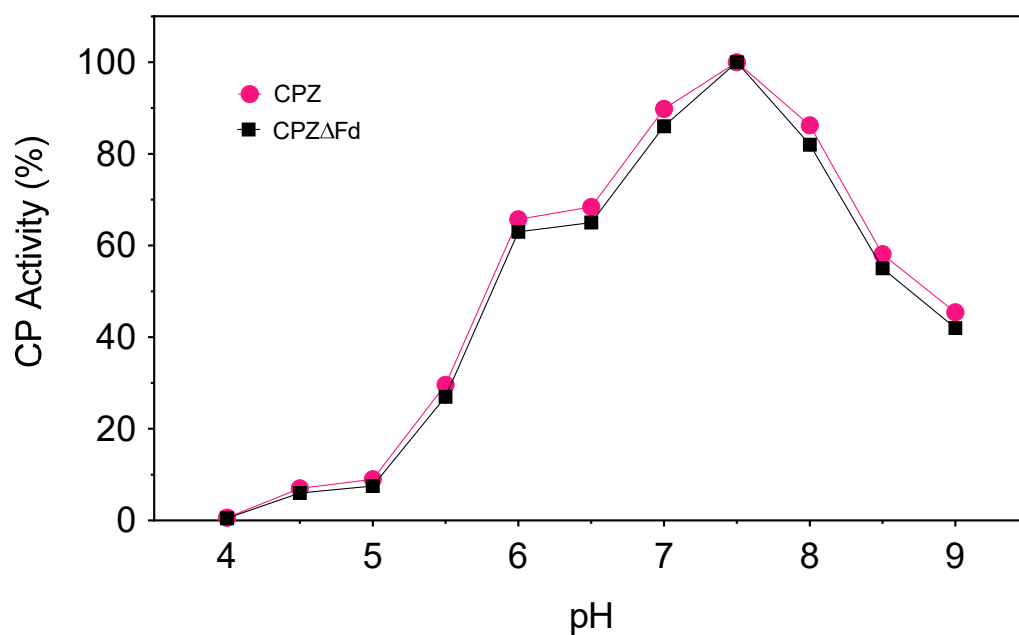

**Figure S1.** Effect of pH on the carboxypeptidase activity of recombinant purified CPZ proteins. Effect of pH on CPZ and CPZΔFz activity using 200  $\mu$ M dansyl-Phe-Ala-Arg in a Tris-acetate buffer at the indicated pH for 60 min at 37°C, as described in the experimental section. Carboxypeptidase activity was represented to the maximal activity at optimal pH and represents the average of three independent measurements (with less than 10% variation

**Figure S2**

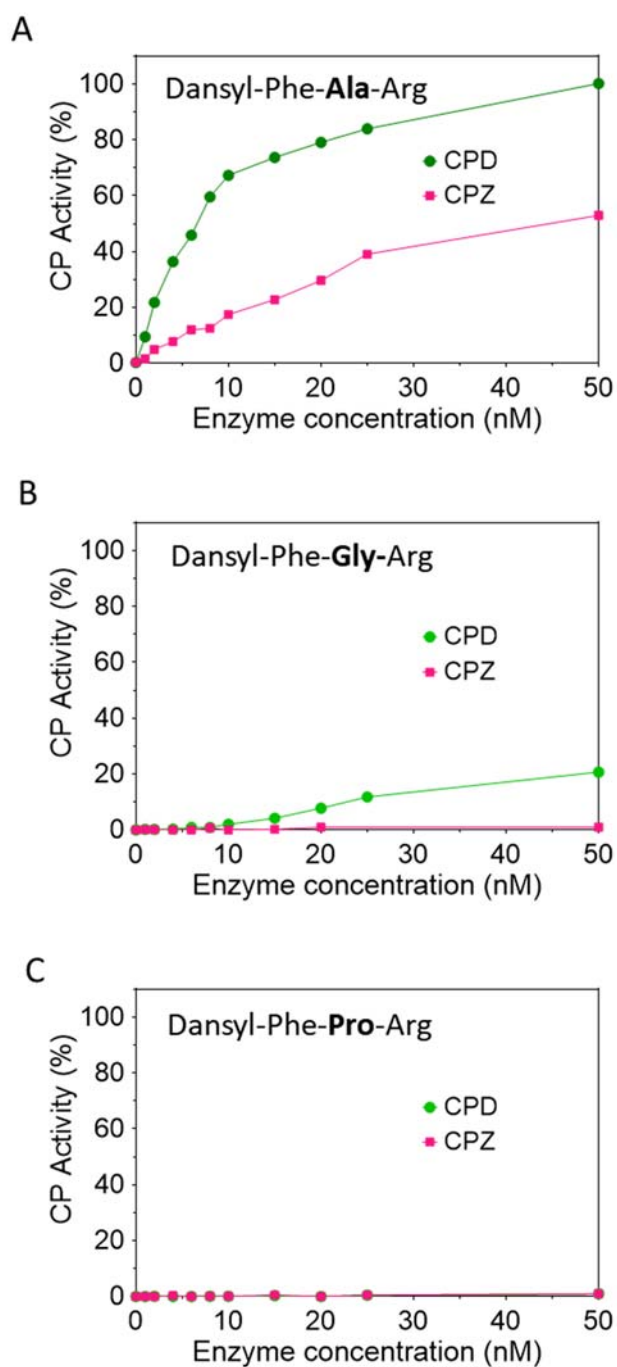

**Figure S2.** Relative amount of product formed by three different dansylated tripeptides incubated with various amounts of purified CPZ and CPD (as control enzyme). Reactions containing 200  $\mu$ M of (A) dansyl-Phe-Ala-Arg, (B) dansyl-Phe-Gly-Arg, or (C) dansyl-Phe-Pro-Arg were incubated with different amounts of CPZ (red line) or CPD (green line) in 100 mM Tris-acetate, pH 7.5 buffer (for CPZ) or 100 mM Tris-acetate, pH 6.9, 150 mM NaCl buffer (for CPD), for 60 min at 37°C. Samples were analyzed as described in the experimental section.
